# Supplementary material
Source: PubMed Central journal article supplement (PMC6439939)
Supplement: jamadermatol-155-290-s001.pdf [file jamadermatol-155-290-s001.pdf]

## Supplementary Online Content

Barbieri JS, Bhate K, Hartnett KP, Fleming-Dutra KE, Margolis DJ. Trends in oral antibiotic prescription in dermatology, 2008 to 2016. *JAMA Dermatol*. Published online January 16, 2019. doi:10.1001/jamadermatol.2018.4944

**eTable.** Antibiotic Tiers

This supplementary material has been provided by the authors to give readers additional information about their work.

**eTable.** Antibiotic Tiers

| <b><u>Tier 1</u></b>            | <b><u>Tier 2</u></b> | <b><u>Tier 3</u></b> | <b><u>Tier 4</u></b> | <b><u>Unlikely to be associated</u></b> |
|---------------------------------|----------------------|----------------------|----------------------|-----------------------------------------|
| Skin and soft tissue infections | Acne                 | Follicular disorders | Atopic dermatitis    | Actinic keratosis                       |
|                                 | Rosacea              | Cysts                | Dermatitis           | Seborrheic keratosis                    |
|                                 | Hidradenitis         |                      | Psoriasis            | Angioma                                 |
|                                 | Surgical Visits      |                      | Pemphigus            | Nevus                                   |
|                                 | Ulcers               |                      | Pemphigoid           | Wart                                    |
|                                 |                      |                      | Sarcoidosis          | Tinea                                   |
|                                 |                      |                      | All other diagnoses  | Other benign neoplasms                  |
|                                 |                      |                      |                      | Neoplasm uncertain behavior             |
